# Supplementary material for: Prevalence of comorbidities and concomitant medication use in acromegaly: analysis of real-world data from the United States
Source: Springer Nature journal article supplement (doi:10.1007/s11102-021-01198-5), 2022-01-01
Supplement: MOESM1 [file 19988214]

## **SUPPLEMENTARY DATA**

### **Prevalence of comorbidities and concomitant medication use in acromegaly: Analysis of real-world data from the United States**

**Journal:** *Pituitary*

Maria Fleseriu, MD,<sup>1</sup> Ariel Barkan, MD,<sup>2</sup> Maria del Pilar Schneider, PhD,<sup>3</sup> Yannis Darhi, MSc,<sup>4</sup> Amicie de Pierrefeu, PhD,<sup>4</sup> Antonio Ribeiro-Oliveira Jr, MD, PhD,<sup>5</sup> Stephan Petersenn, MD,<sup>6</sup> Sebastian Negggers, MD,<sup>7</sup> Shlomo Melmed, MD<sup>8</sup>

<sup>1</sup>Pituitary Center at Oregon Health & Science University, Portland, OR, USA; <sup>2</sup>A. Alfred Taubman Health Care Center, University of Michigan, MI, USA; <sup>3</sup>Ipsen, Les Ulis, France; <sup>4</sup>Ipsen, Boulogne-Billancourt, France; <sup>5</sup>Ipsen, Cambridge, MA, USA; <sup>6</sup>ENDOC Center for Endocrine Tumors, Erik-Blumenfeld-Platz 27a, 22587 Hamburg, Germany; <sup>7</sup>Department of Medicine, Section Endocrinology, Pituitary Center Rotterdam, Erasmus University Medical Center Rotterdam, Rotterdam, The Netherlands; <sup>8</sup>Cedars-Sinai Medical Center, CA, USA

#### **Correspondence to:**

Maria Fleseriu, MD

Pituitary Center, Departments of Medicine (Division of Endocrinology, Diabetes and Clinical Nutrition) and Neurological Surgery,  
Oregon Health & Science University, Portland, Oregon, USA

Address correspondence to:

Maria Fleseriu, MD  
Oregon Health & Science University  
Mail Code CH8N  
3303 SW Bond Ave  
Portland, Oregon 97239  
USA

Email: [fleseriu@ohsu.edu](mailto:fleseriu@ohsu.edu)  
ORCID <https://orcid.org/0000-0001-9284-6289>

**Supplementary Table 1 Prevalence of all concomitant medications by anatomic therapeutic class**

|                                                                          | <b>Acromegaly cohort<br/>(N=1,175)</b> | <b>Control cohort<br/>(N=5,875)</b> |                |
|--------------------------------------------------------------------------|----------------------------------------|-------------------------------------|----------------|
| <b>Anatomical Therapeutic Chemical classification, n (% of patients)</b> |                                        |                                     | <b>p-value</b> |
| Antibacterials for systemic use                                          | 822 (70.0)                             | 3267 (55.6)                         | <0.0001        |
| Analgesics                                                               | 661 (56.3)                             | 2239 (38.1)                         | <0.0001        |
| Cough and cold preparations                                              | 545 (46.4)                             | 2084 (35.5)                         | <0.0001        |
| Psycholeptics                                                            | 501 (42.6)                             | 1455 (24.8)                         | <0.0001        |
| Sex hormones and modulators of the genital system                        | 438 (37.3)                             | 746 (12.7)                          | <0.0001        |
| Thyroid therapy                                                          | 410 (34.9)                             | 520 (8.9)                           | <0.0001        |
| Corticosteroids for systemic use                                         | 408 (34.7)                             | 842 (14.3)                          | <0.0001        |
| Lipid modifying agents                                                   | 402 (34.2)                             | 1547 (26.3)                         | <0.0001        |
| Anti-inflammatory and antirheumatic products                             | 400 (34.0)                             | 1575 (26.8)                         | <0.0001        |
| Psychoanaleptics                                                         | 395 (33.6)                             | 1343 (22.9)                         | <0.0001        |
| Agents acting on the renin-angiotensin system                            | 391 (33.3)                             | 1440 (24.5)                         | <0.0001        |
| Diuretics                                                                | 326 (27.7)                             | 1050 (17.9)                         | <0.0001        |
| Drugs for acid related disorders                                         | 320 (27.2)                             | 1097 (18.7)                         | <0.0001        |
| Antiemetics and antinauseants                                            | 304 (25.9)                             | 819 (13.9)                          | <0.0001        |
| Drugs used in diabetes                                                   | 287 (24.4)                             | 624 (10.6)                          | <0.0001        |
| Muscle relaxants                                                         | 277 (23.6)                             | 839 (14.3)                          | <0.0001        |
| Contrast media                                                           | 257 (21.9)                             | 89 (1.5)                            | <0.0001        |
| Anti-epileptics                                                          | 251 (21.4)                             | 629 (10.7)                          | <0.0001        |
| Beta blocking agents                                                     | 246 (20.9)                             | 827 (14.1)                          | <0.0001        |
| Calcium channel blockers                                                 | 196 (16.7)                             | 674 (11.5)                          | <0.0001        |
| Antihistamines for systemic use                                          | 195 (16.6)                             | 662 (11.3)                          | <0.0001        |
| Urologicals                                                              | 190 (16.2)                             | 682 (11.6)                          | <0.0001        |
| Vitamins                                                                 | 188 (16.0)                             | 435 (7.4)                           | <0.0001        |
| Antivirals for systemic use                                              | 157 (13.4)                             | 594 (10.1)                          | 0.0012         |
| Ophthalmologicals                                                        | 157 (13.4)                             | 576 (9.8)                           | 0.0003         |
| Drugs for obstructive airway diseases                                    | 132 (11.2)                             | 441 (7.5)                           | <0.0001        |
| Pituitary and hypothalamic hormones and analogs                          | 130 (11.1)                             | 15 (0.3)                            | <0.0001        |
| Anesthetics                                                              | 129 (11.0)                             | 298 (5.1)                           | <0.0001        |
| Antibiotics and chemotherapeutics for dermatological use                 | 127 (10.8)                             | 406 (6.9)                           | <0.0001        |
| Antithrombotic agents                                                    | 118 (10.0)                             | 406 (6.9)                           | 0.0002         |
| Drugs for functional gastrointestinal disorders                          | 115 (9.8)                              | 291 (5.0)                           | <0.0001        |

**Supplementary Table 2 Prevalence of all concomitant medications by ingredient**

|                               |                            | Acromegaly cohort<br>(N=1,175) | Control cohort<br>(N=5,875) |         |
|-------------------------------|----------------------------|--------------------------------|-----------------------------|---------|
| Ingredient, n (% of patients) | Form                       |                                |                             | p-value |
| Acetaminophen                 | Oral                       | 541 (46.0)                     | 1824 (31.0)                 | <0.0001 |
| Amoxicillin                   | Oral                       | 457 (38.9)                     | 1616 (27.5)                 | <0.0001 |
| Hydrocodone                   | Oral                       | 428 (36.4)                     | 1445 (24.6)                 | <0.0001 |
| Levothyroxine                 | Oral                       | 400 (34.0)                     | 514 (8.7)                   | <0.0001 |
| Azithromycin                  | Neither oral nor injection | 304 (25.9)                     | 1262 (21.5)                 | 0.0011  |
| Clavulanate                   | Oral                       | 282 (24.0)                     | 862 (14.7)                  | <0.0001 |
| Prednisone                    | Oral                       | 263 (22.4)                     | 938 (16.0)                  | <0.0001 |
| Oxycodone                     | Oral                       | 251 (21.4)                     | 695 (11.8)                  | <0.0001 |
| Fluticasone                   | Neither oral nor injection | 246 (20.9)                     | 938 (16.0)                  | <0.0001 |
| Ciprofloxacin                 | Oral                       | 236 (20.1)                     | 692 (11.8)                  | <0.0001 |
| Gadobutrol                    | Injection                  | 236 (20.1)                     | 77 (1.3)                    | <0.0001 |
| Hydrochlorothiazide           | Oral                       | 235 (20.0)                     | 804 (13.7)                  | <0.0001 |
| Metformin                     | Oral                       | 234 (19.9)                     | 514 (8.7)                   | <0.0001 |
| Potassium chloride            | Oral                       | 215 (18.3)                     | 497 (8.5)                   | <0.0001 |
| Dexamethasone                 | Neither oral nor injection | 213 (18.1)                     | 744 (12.7)                  | <0.0001 |
| Hydrocortisone                | Oral                       | 211 (18.0)                     | 4 (0.1)                     | <0.0001 |
| Triamcinolone                 | Neither oral nor injection | 210 (17.9)                     | 815 (13.9)                  | 0.0005  |
| Fentanyl                      | Neither oral nor injection | 193 (16.4)                     | 495 (8.4)                   | <0.0001 |
| Ondansetron                   | Injection                  | 192 (16.3)                     | 491 (8.4)                   | <0.0001 |
| Ondansetron                   | Oral                       | 187 (15.9)                     | 445 (7.6)                   | <0.0001 |
| Cephalexin                    | Oral                       | 185 (15.7)                     | 675 (11.5)                  | 0.0001  |
| Polyethylene glycol 3350      | Oral                       | 181 (15.4)                     | 367 (6.2)                   | <0.0001 |
| Cyclobenzaprine               | Oral                       | 180 (15.3)                     | 559 (9.5)                   | <0.0001 |
| Ibuprofen                     | Oral                       | 178 (15.1)                     | 704 (12.0)                  | 0.0032  |
| Midazolam                     | Injection                  | 177 (15.1)                     | 488 (8.3)                   | <0.0001 |
| Testosterone                  | Neither oral nor injection | 177 (15.1)                     | 73 (1.2)                    | <0.0001 |
| Albuterol                     | Neither oral nor injection | 177 (15.1)                     | 743 (12.6)                  | 0.0280  |
| Gadopentetate dimeglumine     | Injection                  | 177 (15.1)                     | 55 (0.9)                    | <0.0001 |
| Atorvastatin                  | Oral                       | 176 (15.0)                     | 685 (11.7)                  | 0.0018  |
| Trimethoprim                  | Oral                       | 175 (14.9)                     | 566 (9.6)                   | <0.0001 |
| Sulfamethoxazole              | Oral                       | 174 (14.8)                     | 561 (9.5)                   | <0.0001 |
| Lisinopril                    | Oral                       | 173 (14.7)                     | 754 (12.8)                  | 0.0887  |
| Tramadol                      | Oral                       | 170 (14.5)                     | 497 (8.5)                   | <0.0001 |
| Sodium chloride               | Injection                  | 170 (14.5)                     | 419 (7.1)                   | <0.0001 |
| Doxycycline                   | Oral                       | 170 (14.5)                     | 592 (10.1)                  | <0.0001 |

|                                          |                            | <b>Acromegaly cohort<br/>(N=1,175)</b> | <b>Control cohort<br/>(N=5,875)</b> |                |
|------------------------------------------|----------------------------|----------------------------------------|-------------------------------------|----------------|
| <b>Ingredient, n (%<br/>of patients)</b> | <b>Form</b>                |                                        |                                     | <b>p-value</b> |
| Codeine                                  | Oral                       | 168 (14.3)                             | 692 (11.8)                          | 0.0183         |
| Methylprednisolone                       | Neither oral nor injection | 167 (14.2)                             | 683 (11.6)                          | 0.0148         |
| Omeprazole                               | Oral                       | 162 (13.8)                             | 555 (9.4)                           | <0.0001        |
| Amlodipine                               | Oral                       | 161 (13.7)                             | 544 (9.3)                           | <0.0001        |
| Sodium chloride                          | Oral                       | 161 (13.7)                             | 328 (5.6)                           | <0.0001        |
| Methylprednisolone                       | Injection                  | 141 (12.0)                             | 557 (9.5)                           | 0.0097         |
| Gabapentin                               | Oral                       | 140 (11.9)                             | 351 (6.0)                           | <0.0001        |
| Lidocaine                                | Neither oral nor injection | 137 (11.7)                             | 304 (5.2)                           | <0.0001        |
| Levofloxacin                             | Oral                       | 137 (11.7)                             | 420 (7.1)                           | <0.0001        |
| Ketorolac                                | Injection                  | 134 (11.4)                             | 420 (7.1)                           | <0.0001        |
| Ergocalciferol                           | Oral                       | 132 (11.2)                             | 295 (5.0)                           | <0.0001        |
| Simvastatin                              | Oral                       | 132 (11.2)                             | 512 (8.7)                           | 0.0073         |
| Promethazine                             | Oral                       | 129 (11.0)                             | 473 (8.1)                           | 0.0013         |
| Meloxicam                                | Oral                       | 126 (10.7)                             | 477 (8.1)                           | 0.0043         |
| Sodium bicarbonate                       | Oral                       | 124 (10.6)                             | 240 (4.1)                           | <0.0001        |
| Metoprolol                               | Oral                       | 124 (10.6)                             | 454 (7.7)                           | 0.0016         |
| Testosterone                             | Injection                  | 121 (10.3)                             | 57 (1.0)                            | <0.0001        |
| Alprazolam                               | Oral                       | 119 (10.1)                             | 320 (5.4)                           | <0.0001        |

**Supplementary Table 3 Number of medication ingredients by comorbidity**

|                                                           | Oral medications                 |                                 |         | Injectable medications           |                                 |         |
|-----------------------------------------------------------|----------------------------------|---------------------------------|---------|----------------------------------|---------------------------------|---------|
| <b>Comorbidity</b>                                        |                                  |                                 |         |                                  |                                 |         |
| <b>Number of different ingredients, n (% of patients)</b> | <b>p-value*</b>                  |                                 |         | <b>p-value*</b>                  |                                 |         |
| <b>Cardiovascular disorder</b>                            | <b>Acromegaly Cohort (N=794)</b> | <b>Control Cohort (N=2,844)</b> |         | <b>Acromegaly Cohort (N=794)</b> | <b>Control Cohort (N=2,844)</b> |         |
| 0                                                         | 14 (1.8)                         | 118 (4.1)                       | 0.0021  | 191 (24.1)                       | 1244(43.7)                      | <0.0001 |
| 1                                                         | 18 (2.3)                         | 103 (3.6)                       | 0.0767  | 147 (18.5)                       | 480 (16.9)                      | 0.3048  |
| 2–3                                                       | 55 (6.9)                         | 311 (10.9)                      | 0.0011  | 170 (21.4)                       | 519 (18.2)                      | 0.0501  |
| >3                                                        | 707 (89.0)                       | 2312 (81.3)                     | <0.0001 | 286 (36.0)                       | 601 (21.1)                      | <0.0001 |
| <b>Type 2 diabetes and hyperglycemia</b>                  | <b>Acromegaly Cohort (N=223)</b> | <b>Control Cohort (N=524)</b>   |         | <b>Acromegaly Cohort (N=233)</b> | <b>Control Cohort (N=524)</b>   |         |
| 0                                                         | 1 (0.45)                         | 10 (1.9)                        | 0.2364  | 24 (10.8)                        | 149 (28.4)                      | <0.0001 |
| 1                                                         | 3 (1.3)                          | 6 (1.1)                         | 0.8911  | 38 (17.0)                        | 90 (17.2)                       | 0.9512  |
| 2–3                                                       | 11 (4.9)                         | 29 (5.5)                        | 0.8755  | 59 (26.5)                        | 120 (22.9)                      | 0.3429  |
| >3                                                        | 208 (93.3)                       | 479 (91.4)                      | 0.4780  | 102 (45.7)                       | 165 (31.5)                      | 0.0003  |
| <b>Sleep apnea</b>                                        | <b>Acromegaly Cohort (N=293)</b> | <b>Control Cohort (N=460)</b>   |         | <b>Acromegaly Cohort (N=293)</b> | <b>Control Cohort (N=460)</b>   |         |
| 0                                                         | 5 (1.7)                          | 9 (2.0)                         | 0.9768  | 45 (15.4)                        | 154 (33.5)                      | <0.0001 |
| 1                                                         | 6 (2.0)                          | 16 (3.5)                        | 0.3605  | 46 (15.7)                        | 74 (16.1)                       | 0.9685  |
| 2–3                                                       | 23 (7.8)                         | 34 (7.4)                        | 0.9278  | 63 (21.5)                        | 100 (21.7)                      | 0.9891  |
| >3                                                        | 259 (88.4)                       | 401 (87.2)                      | 0.7015  | 139 (47.4)                       | 132 (28.7)                      | <0.0001 |
| <b>Arthritis and musculoskeletal disorders</b>            | <b>Acromegaly Cohort (N=234)</b> | <b>Control Cohort (N=748)</b>   |         | <b>Acromegaly Cohort (N=234)</b> | <b>Control Cohort (N=748)</b>   |         |
| 0                                                         | 5 (2.1)                          | 20 (2.7)                        | 0.8279  | 33 (14.1)                        | 177 (23.7)                      | 0.0025  |
| 1                                                         | 2 (0.85)                         | 23 (3.1)                        | 0.1002  | 33 (14.1)                        | 134 (17.9)                      | 0.2095  |
| 2–3                                                       | 9 (3.8)                          | 51 (6.8)                        | 0.1335  | 46 (19.7)                        | 190 (25.4)                      | 0.0879  |
| >3                                                        | 218 (93.2)                       | 654 (87.4)                      | 0.0211  | 122 (52.1)                       | 247 (33.0)                      | <0.0001 |

|                                                           | Oral medications                 |                               |        | Injectable medications           |                               |         |
|-----------------------------------------------------------|----------------------------------|-------------------------------|--------|----------------------------------|-------------------------------|---------|
| <b>Comorbidity</b>                                        |                                  |                               |        |                                  |                               |         |
| <b>Number of different ingredients, n (% of patients)</b> | <b>p-value*</b>                  |                               |        | <b>p-value*</b>                  |                               |         |
| <b>Bone disorder</b>                                      | <b>Acromegaly Cohort (N=96)</b>  | <b>Control Cohort (N=218)</b> |        | <b>Acromegaly Cohort (N=96)</b>  | <b>Control Cohort (N=218)</b> |         |
| 0                                                         | 0 (0.00)                         | 9 (4.1)                       | 0.0983 | 15 (15.6)                        | 65 (29.8)                     | 0.0118  |
| 1                                                         | 3 (3.1)                          | 1 (0.46)                      | 0.1631 | 15 (15.6)                        | 46 (21.1)                     | 0.3295  |
| 2-3                                                       | 2 (2.1)                          | 12 (5.5)                      | 0.2907 | 20 (20.8)                        | 52 (23.9)                     | 0.6594  |
| >3                                                        | 91 (94.8)                        | 196 (89.9)                    | 0.2287 | 46 (47.9)                        | 55 (25.2)                     | 0.0001  |
| <b>Malignancy</b>                                         | <b>Acromegaly Cohort (N=265)</b> | <b>Control Cohort (N=505)</b> |        | <b>Acromegaly Cohort (N=265)</b> | <b>Control Cohort (N=505)</b> |         |
| 0                                                         | 4 (1.5)                          | 16 (3.2)                      | 0.2557 | 47 (17.7)                        | 166 (32.9)                    | <0.0001 |
| 1                                                         | 5 (1.9)                          | 17 (3.4)                      | 0.3456 | 50 (18.9)                        | 88 (17.4)                     | 0.6915  |
| 2-3                                                       | 17 (6.4)                         | 37 (7.3)                      | 0.7474 | 51 (19.2)                        | 105 (20.8)                    | 0.6796  |
| >3                                                        | 239 (90.2)                       | 435 (86.1)                    | 0.1332 | 117 (44.2)                       | 146 (28.9)                    | <0.0001 |
| <b>Hypopituitarism and disorder of hypothalamus</b>       | <b>Acromegaly Cohort (N=309)</b> | <b>Control Cohort (N=10)</b>  |        | <b>Acromegaly Cohort (N=309)</b> | <b>Control Cohort (N=10)</b>  |         |
| 0                                                         | 7 (2.3)                          | 0 (0.0)                       | 0.5383 | 61 (19.7)                        | 2 (20.0)                      | 0.7015  |
| 1                                                         | 10 (3.2)                         | 0 (0.0)                       | 0.7309 | 57 (18.4)                        | 3 (30.0)                      | 0.6107  |
| 2-3                                                       | 25 (8.1)                         | 1 (10.0)                      | 0.7114 | 72 (23.3)                        | 2 (20.0)                      | 0.8909  |
| >3                                                        | 267 (86.4)                       | 9 (90.0)                      | 0.8863 | 119 (38.5)                       | 3 (30.0)                      | 0.8302  |

\*p-values calculated using an unpaired t-test.
